# Supplementary material for: Luminescence enhancement effects on nanostructured perovskite thin films for Er/Yb-doped solar cells
Source: Royal Society of Chemistry journal article supplement (doi:10.1039/d1na00782c), 2022-01-01
Supplement: d1na00782c1.pdf [file d1na00782c1.pdf]

## SUPPORTING INFORMATION

# Luminescence Enhancement Effects on Nanostructured Perovskite Thin Films for Er/Yb-Doped Solar Cells

Zhelu Hu,<sup>a</sup> María Ujué González,<sup>b</sup> Zhuoying Chen,<sup>a</sup> Patrick Gredin,<sup>c,d</sup> Michel Mortier,<sup>c</sup>  
Antonio García-Martín,<sup>b</sup> and Lionel Aigouy<sup>a†</sup>

<sup>a</sup>Laboratoire de Physique et d'Etude des Matériaux (LPEM), CNRS, ESPCI Paris, PSL Research University, UPMC, Sorbonne Universités, 10 rue Vauquelin, F-75231 Paris, France

<sup>b</sup>Instituto de Micro y Nanotecnología IMN-CNM, CSIC, CEI UAM+CSIC, Isaac Newton 8, E-28760 Tres Cantos, Madrid, Spain

<sup>c</sup>Institut de Recherche de Chimie Paris, Chimie ParisTech, CNRS, PSL Research University, 11 rue Pierre et Marie Curie, F-75005 Paris, France.

<sup>d</sup>Sorbonne Université, Faculté des sciences en Ingénierie, 4 place Jussieu, F-75005 Paris, France.

## 1) NANOCRYSTAL SYNTHESIS:

Up-converting nanocrystals made of  $KY_3F_{10}$  codoped with  $Er^{3+}$  (2 mole %) and  $Yb^{3+}$  (8 mole %) have been obtained by hydrothermal method at 180°C (filling rate 60%) for two days. It was started from a mixture of solution of potassium, yttrium, erbium and ytterbium nitrates ( $K(NO_3)$ ,  $Y(NO_3)_3 \cdot 6H_2O$ ,  $Er(NO_3)_3 \cdot 5H_2O$ ,  $Yb(NO_3)_3 \cdot 5H_2O$ ) in stoichiometric amount dissolved in a solvent constituted of excess of 40% hydrofluoric acid % and water. The chemical reaction is:

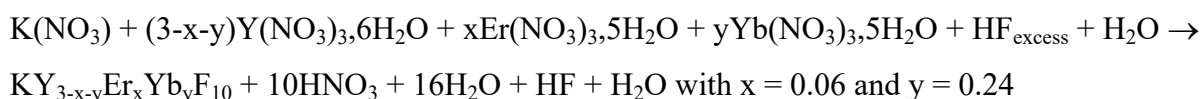

The nanoparticles were then washed by at least four dispersion/centrifugation cycles in water. Afterwards, they were dried at low temperature (60 – 80°C) in a laboratory oven [S1]. As

seen in the scanning electron microscope image (SEM) shown in Figure S.1, the size of the nanocrystal is in the range 50-150 nm.

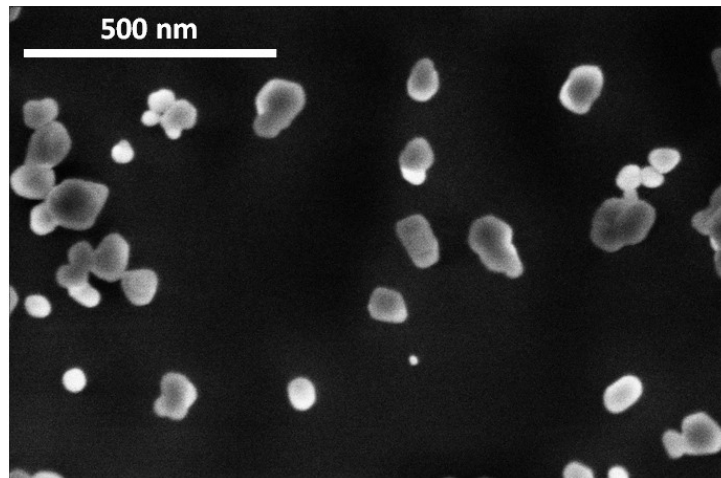

Figure S.1 : SEM picture of the luminescent up-converting nanocrystals. Their diameter is in the [50-150] nm range.

## 2) UP-CONVERSION LUMINESCENCE SPECTRUM OF THE NANOCRYSTALS

$\text{KY}_3\text{F}_{10}:\text{Er}/\text{Yb}$  nanocrystals were excited in the near-infrared part of the electromagnetic spectrum, at  $\lambda = 975 \text{ nm}$  [S2]. This excitation scheme is known as up-conversion (see Figure S.2). Two near-infrared photons are absorbed and, after several energy transfers between the ions, fluorescence occurs, in the visible range, at three different wavelengths ( $\lambda = 525 \text{ nm}$ ,  $\lambda = 550 \text{ nm}$ , and  $\lambda = 660 \text{ nm}$ ).

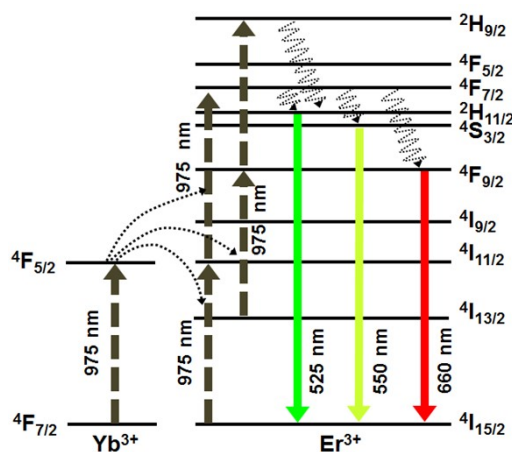

Figure S.2: Energy level diagram of the up-converting nanocrystals, after an excitation at  $\lambda = 975 \text{ nm}$ .

The luminescence spectrum of the nanocrystals is shown in Figure S.3. In the experiments described in the core of the article, we are detecting the green and yellow fluorescence lines, in the range [525-550] nm that correspond to the two transitions  ${}^2H_{11/2} \rightarrow {}^4I_{15/2}$  and  ${}^4S_{3/2} \rightarrow {}^4I_{15/2}$ . The luminescence spectrum of the nanocrystals is shown in Figure S.3.

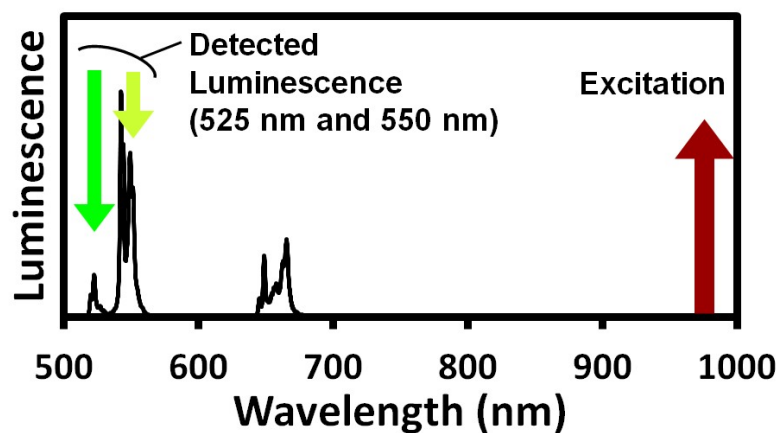

Figure S.3: Luminescence spectrum of the nanocrystals after an excitation at 975 nm.

### 3) TIP FABRICATION PROCEDURE

A single up-converting nanocrystal was glued at the end of a sharp tungsten tip using a homemade nanomanipulation system. The set-up for performing this operation is described in reference S3. An SEM picture of an example of nanocrystal glued at the end of a sharp tip is shown in Figure. S.4.

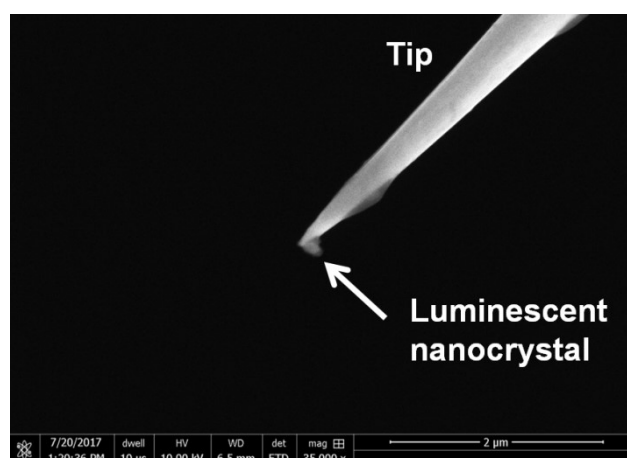

Figure S.4: SEM picture of an example of tip with a nanocrystal attached at its end.

- [S1] A. Assy, H.-J. Lin, M. Schoenauer-Sebag, P. Gredin, M. Mortier, L. Billot, Z. Chen, and L. Aigouy, *Sens. Actuators A* **2016**, 250, 71.
- [S2] L. Aigouy, M.-U. González, H.-J. Lin, M. Schoenauer-Sebag, L. Billot, P. Gredin, M. Mortier, Z. Chen, and A. García-Martín, *Nanoscale* **2019**, 11, 10365.
- [S3] L. Aigouy, Y. De Wilde, M. Mortier, J. Giérak, and E. Bourhis, *Applied Optics* **2004**, 43(19), 3829.
